# Supplementary material
Source: PubMed Central journal article supplement (PMC9898458)
Supplement: NIHMS1828093-supplement-1.pdf [file NIHMS1828093-supplement-1.pdf]

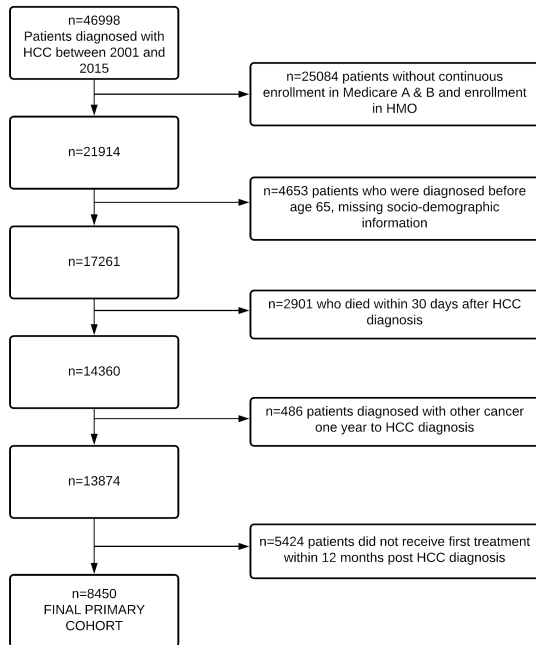

Journal Pre-proof

**Table 1.** Types of first HCC treatment by presence and absence of treatment delay (within 12 months post HCC diagnosis)

|                              | Transplant |       | Resection |       | Ablation |       | Embolization |       | Systemic<br>Chemotherapy |       | Radiation |       |
|------------------------------|------------|-------|-----------|-------|----------|-------|--------------|-------|--------------------------|-------|-----------|-------|
|                              | n          | %     | n         | %     | n        | %     | n            | %     | n                        | %     | n         | %     |
| <b>Timely<br/>treatment</b>  | 120        | 78.4% | 1127      | 93.2% | 1051     | 84.8% | 2907         | 83.2% | 1641                     | 86.7% | 399       | 85.8% |
| <b>Delayed<br/>treatment</b> | 33         | 21.6% | 82        | 6.8%  | 188      | 15.2% | 585          | 16.8% | 251                      | 13.3% | 66        | 14.2% |
| <b>Total</b>                 | 153        |       | 1209      |       | 1239     |       | 3492         |       | 1892                     |       | 465       |       |

Journal Pre-proof

**Table 2.** Correlates of overall survival – 5-month landmark in early-stage HCC (with and without type of first HCC treatment)

|                                                    | <b>Overall survival<br/>(Without first HCC<br/>treatment)<br/>n=1720<br/>HR (95% CI)</b> | <b>Overall survival<br/>(with first HCC<br/>treatment)<br/>n=1720<br/>HR (95% CI)</b> |
|----------------------------------------------------|------------------------------------------------------------------------------------------|---------------------------------------------------------------------------------------|
| <b>Delayed treatment</b>                           | 1.21 (1.02,1.44)                                                                         | 1.11 (0.92,1.33)                                                                      |
| <b>Age at diagnosis</b>                            |                                                                                          |                                                                                       |
| 65 - 69 years                                      | Ref                                                                                      | Ref                                                                                   |
| 70 - 74 years                                      | 1.17 (1.00,1.37)                                                                         | 1.18 (1.00,1.38)                                                                      |
| 75 - 79 years                                      | 1.37 (1.16,1.63)                                                                         | 1.33 (1.12,1.58)                                                                      |
| 80 years and older                                 | 1.71 (1.43,2.05)                                                                         | 1.56 (1.29,1.87)                                                                      |
| <b>Male</b>                                        | 1.18 (1.04,1.33)                                                                         | 1.19 (1.05,1.36)                                                                      |
| <b>Race and ethnicity</b>                          |                                                                                          |                                                                                       |
| White                                              | Ref                                                                                      | Ref                                                                                   |
| Black                                              | 1.43 (0.82,2.49)                                                                         | 1.54 (0.85,2.76)                                                                      |
| Asian                                              | 0.83 (0.63,1.08)                                                                         | 0.85 (0.65,1.11)                                                                      |
| Hispanic                                           | 0.84 (0.51,1.40)                                                                         | 0.83 (0.52,1.35)                                                                      |
| Other/Unknown                                      | 0.61 (0.44,0.86)                                                                         | 0.69 (0.48,0.98)                                                                      |
| <b>Neighborhood-level SES</b>                      |                                                                                          |                                                                                       |
| Low poverty neighborhoods                          | Ref                                                                                      | Ref                                                                                   |
| Moderate poverty neighborhoods                     | 0.95 (0.79,1.12)                                                                         | 0.92 (0.78,1.10)                                                                      |
| High poverty neighborhoods                         | 1.10 (0.89,1.36)                                                                         | 1.06 (0.86,1.32)                                                                      |
| <b>Interaction of race, ethnicity, and poverty</b> |                                                                                          |                                                                                       |
| Black#Moderate poverty neighborhoods               | 0.82 (0.41,1.63)                                                                         | 0.76 (0.38,1.54)                                                                      |
| Black#Poor neighborhoods                           | 0.85 (0.44,1.63)                                                                         | 0.73 (0.37,1.43)                                                                      |
| Asian#Moderate poverty neighborhoods               | 0.75 (0.49,1.14)                                                                         | 0.79 (0.52,1.20)                                                                      |
| Asian#Poor neighborhoods                           | 0.86 (0.56,1.33)                                                                         | 0.84 (0.54,1.32)                                                                      |
| Hispanic#Moderate poverty neighborhoods            | 1.64 (0.79,3.40)                                                                         | 1.61 (0.78,3.32)                                                                      |
| Hispanic#Poor neighborhoods                        | 0.78 (0.39,1.56)                                                                         | 0.80 (0.40,1.58)                                                                      |
| <b>Geographic region</b>                           |                                                                                          |                                                                                       |
| West                                               | Ref                                                                                      | Ref                                                                                   |
| Northeast                                          | 0.90 (0.74,1.08)                                                                         | 0.95(0.78,1.15)                                                                       |
| Midwest                                            | 1.16 (0.93,1.44)                                                                         | 1.16(0.93,1.44)                                                                       |
| South                                              | 1.04 (0.86,1.24)                                                                         | 1.13(0.94,1.37)                                                                       |
| <b>Metropolitan status</b>                         |                                                                                          |                                                                                       |
| Metro > 1 million                                  | Ref                                                                                      | Ref                                                                                   |
| Metro 250,000 - 1 million                          | 1.06 (0.91,1.24)                                                                         | 1.06 (0.90,1.24)                                                                      |
| Metro <250,000                                     | 1.17 (0.92,1.50)                                                                         | 1.18 (0.91,1.53)                                                                      |
| Non-Metro                                          | 0.97 (0.77,1.22)                                                                         | 0.97 (0.77,1.22)                                                                      |

|                                    |                  |                  |
|------------------------------------|------------------|------------------|
| <b>NCI comorbidity index</b>       |                  |                  |
| 0                                  | Ref              | Ref              |
| 1                                  | 0.93 (0.74,1.17) | 0.94 (0.75,1.18) |
| 2                                  | 1.03 (0.83,1.28) | 1.02 (0.82,1.26) |
| 3                                  | 1.08 (0.87,1.34) | 1.04 (0.83,1.30) |
| 4                                  | 1.16 (0.86,1.55) | 1.10 (0.82,1.47) |
| >=5                                | 1.31 (1.02,1.67) | 1.29 (1.01,1.65) |
| <b>Liver disease etiology</b>      |                  |                  |
| HCV                                | Ref              | Ref              |
| HBV                                | 0.67 (0.51,0.87) | 0.70 (0.54,0.92) |
| Alcohol related liver disease      | 1.24 (1.01,1.51) | 1.28 (1.05,1.57) |
| Other liver diseases               | 0.62 (0.41,0.93) | 0.65 (0.43,1.00) |
| MAFLD                              | 0.96 (0.82,1.13) | 1.06 (0.90,1.25) |
| No identifiable liver disease      | 0.98 (0.77,1.25) | 1.10 (0.86,1.41) |
| <b>Liver dysfunction</b>           |                  |                  |
| Presence of hepatic encephalopathy | 1.32 (1.06,1.66) | 1.34 (1.07,1.67) |
| Presence of ascites                | 1.19 (0.99,1.44) | 1.10 (0.91,1.33) |
| <b>First HCC treatment type</b>    |                  |                  |
| Liver transplantation              |                  | 0.36 (0.24,0.55) |
| Surgical resection                 |                  | 0.49 (0.40,0.60) |
| Local ablation                     |                  | 0.91 (0.79,1.05) |
| Embolization                       |                  | Ref              |
| Systemic chemotherapy              |                  | 1.20 (0.93,1.53) |
| Radiation                          |                  | 1.65 (1.16,2.36) |

**Table 3.** Correlates of overall survival – 5-month landmark in advanced stage HCC (with and without type of first HCC treatment)

|                                                    | <b>Overall survival<br/>(Without first<br/>HCC treatment)<br/>n=3568<br/>HR (95% CI)</b> | <b>Overall survival<br/>(with first HCC<br/>treatment)<br/>n=3568<br/>HR (95% CI)</b> |
|----------------------------------------------------|------------------------------------------------------------------------------------------|---------------------------------------------------------------------------------------|
| <b>Delayed treatment</b>                           | 1.20 (1.08,1.34)                                                                         | 1.14 (1.02,1.27)                                                                      |
| <b>Age at diagnosis</b>                            |                                                                                          |                                                                                       |
| 65 - 69 years                                      | Ref                                                                                      | Ref                                                                                   |
| 70 - 74 years                                      | 1.23 [1.11,1.37]                                                                         | 1.24 (1.11,1.38)                                                                      |
| 75 - 79 years                                      | 1.41 (1.26,1.57)                                                                         | 1.36 (1.22,1.52)                                                                      |
| 80 years and older                                 | 1.49 (1.33,1.66)                                                                         | 1.41 (1.26,1.58)                                                                      |
| <b>Male</b>                                        | 1.12 (1.03,1.21)                                                                         | 1.07 (0.98,1.16)                                                                      |
| <b>Race and ethnicity</b>                          |                                                                                          |                                                                                       |
| White                                              | Ref                                                                                      | Ref                                                                                   |
| Black                                              | 1.03 (0.73,1.45)                                                                         | 0.91 (0.63,1.32)                                                                      |
| Asian                                              | 0.84 (0.71,0.99)                                                                         | 0.77 (0.65,0.92)                                                                      |
| Hispanic                                           | 1.58 (1.09,2.28)                                                                         | 1.50 (1.06,2.14)                                                                      |
| Other/Unknown                                      | 0.84 (0.67,1.05)                                                                         | 0.86 (0.69,1.07)                                                                      |
| <b>Neighborhood-level SES</b>                      |                                                                                          |                                                                                       |
| Low poverty neighborhoods                          | Ref                                                                                      | Ref                                                                                   |
| Moderate poverty neighborhoods                     | 1.06 (0.95,1.18)                                                                         | 1.04 (0.93,1.15)                                                                      |
| High poverty neighborhoods                         | 1.15 (1.01,1.31)                                                                         | 1.07 (0.94,1.23)                                                                      |
| <b>Interaction of race, ethnicity, and poverty</b> |                                                                                          |                                                                                       |
| Black#Moderate poverty neighborhoods               | 0.92 (0.60,1.42)                                                                         | 0.96 (0.61,1.50)                                                                      |
| Black#Poor neighborhoods                           | 0.98 (0.65,1.47)                                                                         | 1.07 (0.69,1.65)                                                                      |
| Asian#Moderate poverty neighborhoods               | 1.16 (0.91,1.48)                                                                         | 1.27 (0.99,1.63)                                                                      |
| Asian#Poor neighborhoods                           | 0.95 (0.70,1.27)                                                                         | 0.99 (0.71,1.36)                                                                      |
| Hispanic#Moderate poverty neighborhoods            | 0.94 (0.60,1.48)                                                                         | 0.96 (0.62,1.47)                                                                      |
| Hispanic#Poor neighborhoods                        | 0.71 (0.45,1.13)                                                                         | 0.73 (0.46,1.16)                                                                      |
| <b>Geographic region</b>                           |                                                                                          |                                                                                       |
| West                                               | Ref                                                                                      | Ref                                                                                   |
| Northeast                                          | 0.98 (0.88,1.09)                                                                         | 1.02 (0.91,1.13)                                                                      |
| Midwest                                            | 1.15 (1.00,1.31)                                                                         | 1.13 (0.97,1.30)                                                                      |
| South                                              | 1.10 (0.98,1.24)                                                                         | 1.20 (1.06,1.36)                                                                      |
| <b>Metropolitan status</b>                         |                                                                                          |                                                                                       |
| Metro > 1 million                                  | Ref                                                                                      | Ref                                                                                   |
| Metro 250,000 - 1 million                          | 1.09 (0.99,1.20)                                                                         | 1.09 (0.99,1.20)                                                                      |
| Metro <250,000                                     | 0.96 (0.83,1.11)                                                                         | 0.92 (0.79,1.07)                                                                      |
| Non-Metro                                          | 0.88 (0.77,1.01)                                                                         | 0.89 (0.77,1.02)                                                                      |

|                                    |                  |                  |
|------------------------------------|------------------|------------------|
| <b>NCI comorbidity index</b>       |                  |                  |
| 0                                  | Ref              | Ref              |
| 1                                  | 1.07 (0.96,1.20) | 1.09 (0.97,1.23) |
| 2                                  | 0.98 (0.87,1.11) | 1.00 (0.89,1.14) |
| 3                                  | 1.11 (0.98,1.26) | 1.14 (1.00,1.30) |
| 4                                  | 1.23 (1.05,1.45) | 1.24 (1.05,1.48) |
| >=5                                | 1.30 (1.13,1.50) | 1.30 (1.12,1.52) |
| <b>Liver disease etiology</b>      |                  |                  |
| HCV                                | Ref              | Ref              |
| HBV                                | 0.73 (0.60,0.88) | 0.81 (0.66,0.98) |
| Alcohol related liver disease      | 1.02 (0.88,1.17) | 1.00 (0.87,1.15) |
| Other liver diseases               | 1.15 (0.88,1.48) | 1.21 (0.94,1.55) |
| MAFLD                              | 1.02 (0.93,1.13) | 1.04 (0.94,1.15) |
| No identifiable liver disease      | 1.21 (1.07,1.37) | 1.27 (1.11,1.45) |
| <b>Liver dysfunction</b>           |                  |                  |
| Presence of hepatic encephalopathy | 1.02 (0.85,1.23) | 1.06 (0.88,1.27) |
| Presence of ascites                | 1.16 (1.01,1.33) | 1.08 (0.93,1.24) |
| <b>First HCC treatment type</b>    |                  |                  |
| Embolization                       |                  | Ref              |
| Liver transplantation              |                  | 0.30 (0.20,0.43) |
| Surgical resection                 |                  | 0.48 (0.42,0.53) |
| Local ablation                     |                  | 0.77 (0.68,0.86) |
| Systemic chemotherapy              |                  | 1.58 (1.43,1.75) |
| Radiation                          |                  | 1.88 (1.52,2.31) |

**Table 4.** Correlates of overall survival – 5-month landmark in patients who received curative treatment (with and without type of first HCC treatment)

|                                                    | <b>Overall survival<br/>(Without first<br/>HCC treatment)<br/>n=2290<br/>HR (95% CI)</b> | <b>Overall survival<br/>(with first HCC<br/>treatment)<br/>n=2290<br/>HR (95% CI)</b> |
|----------------------------------------------------|------------------------------------------------------------------------------------------|---------------------------------------------------------------------------------------|
| <b>Delayed treatment</b>                           | 1.21 (1.02,1.44)                                                                         | 1.10 (0.92,1.31)                                                                      |
| <b>Age at diagnosis</b>                            |                                                                                          |                                                                                       |
| 65 - 69 years                                      | Ref                                                                                      | Ref                                                                                   |
| 70 - 74 years                                      | 1.01 (0.88,1.16)                                                                         | 0.95 (0.82,1.09)                                                                      |
| 75 - 79 years                                      | 1.34 (1.16,1.55)                                                                         | 1.20 (1.04,1.39)                                                                      |
| 80 years and older                                 | 1.57 (1.35,1.83)                                                                         | 1.38 (1.18,1.61)                                                                      |
| <b>Male</b>                                        | 1.09 (0.98,1.22)                                                                         | 1.11 (0.99,1.24)                                                                      |
| <b>Race and ethnicity</b>                          |                                                                                          |                                                                                       |
| White                                              | Ref                                                                                      | Ref                                                                                   |
| Black                                              | 1.03 (0.65,1.64)                                                                         | 1.01 (0.61,1.67)                                                                      |
| Asian                                              | 0.97 (0.78,1.21)                                                                         | 0.99 (0.79,1.23)                                                                      |
| Hispanic                                           | 1.05 (0.57,1.92)                                                                         | 1.04 (0.58,1.85)                                                                      |
| Other/Unknown                                      | 0.71 (0.53,0.94)                                                                         | 0.74 (0.56,0.99)                                                                      |
| <b>Neighborhood-level SES</b>                      |                                                                                          |                                                                                       |
| Low poverty neighborhoods                          | Ref                                                                                      | Ref                                                                                   |
| Moderate poverty neighborhoods                     | 0.90 (0.77,1.06)                                                                         | 0.93 (0.80,1.09)                                                                      |
| High poverty neighborhoods                         | 1.08 (0.90,1.30)                                                                         | 1.13 (0.94,1.35)                                                                      |
| <b>Interaction of race, ethnicity, and poverty</b> |                                                                                          |                                                                                       |
| Black#Moderate poverty neighborhoods               | 1.09 (0.61,1.95)                                                                         | 1.07 (0.58,1.96)                                                                      |
| Black#Poor neighborhoods                           | 1.32 (0.77,2.26)                                                                         | 1.16 (0.65,2.06)                                                                      |
| Asian#Moderate poverty neighborhoods               | 0.76 (0.54,1.08)                                                                         | 0.71 (0.49,1.01)                                                                      |
| Asian#Poor neighborhoods                           | 0.81 (0.54,1.21)                                                                         | 0.83 (0.55,1.25)                                                                      |
| Hispanic#Moderate poverty neighborhoods            | 1.20 (0.55,2.62)                                                                         | 1.12 (0.53,2.38)                                                                      |
| Hispanic#Poor neighborhoods                        | 0.91 (0.44,1.90)                                                                         | 0.92 (0.46,1.84)                                                                      |
| <b>Geographic region</b>                           |                                                                                          |                                                                                       |
| West                                               | Ref                                                                                      | Ref                                                                                   |
| Northeast                                          | 1.03 (0.89,1.19)                                                                         | 1.04 (0.90,1.19)                                                                      |
| Midwest                                            | 1.18 (0.97,1.44)                                                                         | 1.21 (1.00,1.47)                                                                      |
| South                                              | 1.15 (0.99,1.35)                                                                         | 1.26 (1.08,1.47)                                                                      |
| <b>Metropolitan status</b>                         |                                                                                          |                                                                                       |
| Metro > 1 million                                  | Ref                                                                                      | Ref                                                                                   |
| Metro 250,000 - 1 million                          | 1.12 (0.98,1.28)                                                                         | 1.12 (0.98,1.28)                                                                      |
| Metro <250,000                                     | 1.24 (1.01,1.53)                                                                         | 1.20 (0.97,1.49)                                                                      |
| Non-Metro                                          | 0.94 (0.78,1.14)                                                                         | 0.95 (0.79,1.15)                                                                      |

|                                                          |                  |                  |
|----------------------------------------------------------|------------------|------------------|
| <b>Tumor Staging</b>                                     |                  |                  |
| Unifocal <=5 cm without vascular invasion and metastasis | Ref              | Ref              |
| Beyond unifocal without vascular invasion and metastasis | 1.20 (1.07,1.35) | 1.28 (1.14,1.44) |
| Vascular invasion or metastasis                          | 1.86 (1.49,2.32) | 2.19 (1.77,2.73) |
| Non-determinable                                         | 1.59 (1.37,1.86) | 1.79 (1.53,2.09) |
| <b>NCI comorbidity index</b>                             |                  |                  |
| 0                                                        | Ref              | Ref              |
| 1                                                        | 0.97 (0.83,1.14) | 0.96 (0.82,1.12) |
| 2                                                        | 1.11 (0.94,1.31) | 1.06 (0.90,1.25) |
| 3                                                        | 1.16 (0.97,1.38) | 1.15 (0.96,1.37) |
| 4                                                        | 1.54 (1.22,1.93) | 1.48 (1.18,1.86) |
| >=5                                                      | 1.25 (1.02,1.54) | 1.22 (0.99,1.50) |
| <b>Liver disease etiology</b>                            |                  |                  |
| HCV                                                      | Ref              | Ref              |
| HBV                                                      | 0.63 (0.50,0.80) | 0.65 (0.51,0.83) |
| Alcohol related liver disease                            | 0.94 (0.76,1.17) | 1.00 (0.82,1.23) |
| Other liver diseases                                     | 0.75 (0.52,1.10) | 0.84 (0.57,1.23) |
| MAFLD                                                    | 0.81 (0.71,0.92) | 0.87 (0.76,1.00) |
| No identifiable liver disease                            | 0.90 (0.76,1.07) | 0.95 (0.79,1.13) |
| <b>Liver dysfunction</b>                                 |                  |                  |
| Presence of hepatic encephalopathy                       | 0.90 (0.68,1.19) | 1.01 (0.76,1.34) |
| Presence of ascites                                      | 1.37 (1.10,1.70) | 1.34 (1.07,1.67) |
| <b>First HCC treatment type</b>                          |                  |                  |
| Liver transplantation                                    |                  | Ref              |
| Surgical resection                                       |                  | 1.87 (1.38,2.53) |
| Local ablation                                           |                  | 2.98 (2.23,4.00) |



**Table 5.** Correlates of overall survival – 5-month landmark in patients who received non curative treatment (with and without type of first HCC treatment)

|                                                    | <b>Delayed treatment<br/>(without first HCC<br/>treatment)<br/>n=4354<br/>OR (95% CI)</b> | <b>Delayed<br/>treatment (with<br/>first HCC<br/>treatment)<br/>n=4354<br/>OR (95% CI)</b> |
|----------------------------------------------------|-------------------------------------------------------------------------------------------|--------------------------------------------------------------------------------------------|
| <b>Delayed treatment</b>                           | 1.04 (0.95,1.15)                                                                          | 1.06 (0.97,1.17)                                                                           |
| <b>Age at diagnosis</b>                            |                                                                                           |                                                                                            |
| 65 - 69 years                                      | Ref                                                                                       | Ref                                                                                        |
| 70 - 74 years                                      | 1.24 (1.13,1.36)                                                                          | 1.24 (1.13,1.36)                                                                           |
| 75 - 79 years                                      | 1.29 (1.18,1.42)                                                                          | 1.27 (1.15,1.40)                                                                           |
| 80 years and older                                 | 1.33 (1.20,1.47)                                                                          | 1.33 (1.21,1.47)                                                                           |
| <b>Male</b>                                        | 1.10 (1.03,1.19)                                                                          | 1.10 (1.02,1.19)                                                                           |
| <b>Race and ethnicity</b>                          |                                                                                           |                                                                                            |
| White                                              | Ref                                                                                       | Ref                                                                                        |
| Black                                              | 0.71 (0.49,1.02)                                                                          | 0.69 (0.48,1.00)                                                                           |
| Asian                                              | 0.72 (0.62,0.83)                                                                          | 0.71 (0.61,0.82)                                                                           |
| Hispanic                                           | 1.44 (1.09,1.91)                                                                          | 1.38 (1.05,1.81)                                                                           |
| Other/Unknown                                      | 0.76 (0.62,0.92)                                                                          | 0.78 (0.64,0.96)                                                                           |
| <b>Neighborhood-level SES</b>                      |                                                                                           |                                                                                            |
| Low poverty neighborhoods                          | Ref                                                                                       | Ref                                                                                        |
| Moderate poverty neighborhoods                     | 1.04 (0.95,1.13)                                                                          | 1.02 (0.94,1.12)                                                                           |
| High poverty neighborhoods                         | 1.02 (0.91,1.15)                                                                          | 0.97 (0.87,1.10)                                                                           |
| <b>Interaction of race, ethnicity, and poverty</b> |                                                                                           |                                                                                            |
| Black#Moderate poverty neighborhoods               | 1.22 (0.80,1.86)                                                                          | 1.28 (0.84,1.96)                                                                           |
| Black#Poor neighborhoods                           | 1.38 (0.91,2.09)                                                                          | 1.41 (0.92,2.15)                                                                           |
| Asian#Moderate poverty neighborhoods               | 1.21 (0.98,1.51)                                                                          | 1.25 (1.01,1.55)                                                                           |
| Asian#Poor neighborhoods                           | 1.07 (0.82,1.39)                                                                          | 1.10 (0.84,1.43)                                                                           |
| Hispanic#Moderate poverty neighborhoods            | 0.82 (0.56,1.21)                                                                          | 0.89 (0.61,1.28)                                                                           |
| Hispanic#Poor neighborhoods                        | 0.71 (0.49,1.04)                                                                          | 0.72 (0.50,1.04)                                                                           |
| <b>Geographic region</b>                           |                                                                                           |                                                                                            |
| West                                               | Ref                                                                                       | Ref                                                                                        |
| Northeast                                          | 0.93 (0.85,1.03)                                                                          | 0.94 (0.86,1.04)                                                                           |
| Midwest                                            | 1.07 (0.94,1.21)                                                                          | 1.08 (0.95,1.23)                                                                           |
| South                                              | 1.12 (1.01,1.24)                                                                          | 1.14 (1.03,1.26)                                                                           |
| <b>Metropolitan status</b>                         |                                                                                           |                                                                                            |
| Metro > 1 million                                  | Ref                                                                                       | Ref                                                                                        |
| Metro 250,000 - 1 million                          | 0.99 (0.91,1.07)                                                                          | 0.98 (0.90,1.07)                                                                           |
| Metro <250,000                                     | 0.94 (0.81,1.08)                                                                          | 0.92 (0.79,1.06)                                                                           |
| Non-Metro                                          | 0.93 (0.83,1.06)                                                                          | 0.93 (0.82,1.05)                                                                           |

|                                                          |                  |                  |
|----------------------------------------------------------|------------------|------------------|
| <b>Tumor Staging</b>                                     |                  |                  |
| Unifocal <=5 cm without vascular invasion and metastasis | Ref              | Ref              |
| Beyond unifocal without vascular invasion and metastasis | 1.57 (1.44,1.71) | 1.54 (1.41,1.69) |
| Vascular invasion or metastasis                          | 2.33 (1.91,2.83) | 2.20 (1.80,2.70) |
| Non-determinable                                         | 1.94 (1.75,2.16) | 1.86 (1.67,2.07) |
| <b>NCI comorbidity index</b>                             |                  |                  |
| 0                                                        | Ref              | Ref              |
| 1                                                        | 1.09 (0.98,1.22) | 1.09 (0.98,1.21) |
| 2                                                        | 1.00 (0.89,1.12) | 1.03 (0.92,1.15) |
| 3                                                        | 1.05 (0.93,1.17) | 1.07 (0.96,1.20) |
| 4                                                        | 1.08 (0.92,1.27) | 1.06 (0.90,1.25) |
| >=5                                                      | 1.24 (1.09,1.41) | 1.23 (1.09,1.40) |
| <b>Liver disease etiology</b>                            |                  |                  |
| HCV                                                      | Ref              | Ref              |
| HBV                                                      | 0.73 (0.61,0.86) | 0.73 (0.61,0.87) |
| Alcohol related liver disease                            | 1.08 (0.96,1.22) | 1.07 (0.96,1.21) |
| Other liver diseases                                     | 0.94 (0.75,1.19) | 1.00 (0.80,1.25) |
| MAFLD                                                    | 1.14 (1.04,1.24) | 1.10 (1.01,1.21) |
| No identifiable liver disease                            | 1.26 (1.11,1.42) | 1.21 (1.07,1.37) |
| <b>Liver dysfunction</b>                                 |                  |                  |
| Presence of hepatic encephalopathy                       | 1.10 (0.96,1.27) | 1.11 (0.96,1.27) |
| Presence of ascites                                      | 1.03 (0.92,1.15) | 1.02 (0.91,1.14) |
| <b>First HCC treatment type</b>                          |                  |                  |
| Embolization                                             |                  | Ref              |
| Systemic chemotherapy                                    |                  | 1.54 (1.43,1.66) |
| Radiation                                                |                  | 1.52 (1.31,1.76) |

**Table 6.** Sensitivity analysis using 5, 6, 7, 8, 9-month landmark

|                          | Sample size | Delayed Treatment                          |                                          |
|--------------------------|-------------|--------------------------------------------|------------------------------------------|
|                          |             | Without first HCC treatment<br>HR (95% CI) | With first HCC treatment)<br>HR (95% CI) |
| <b>5- month landmark</b> | 6644        | 1.15 (1.05 – 1.25)                         | 1.07 (0.98 – 1.17)                       |
| <b>6- month landmark</b> | 6487        | 1.14 (1.05 – 1.23)                         | 1.06 (0.98 – 1.16)                       |
| <b>7- month landmark</b> | 6328        | 1.17 (1.08 – 1.27)                         | 1.10 (1.01 – 1.19)                       |
| <b>8- month landmark</b> | 6133        | 1.20 (1.11 – 1.30)                         | 1.11 (1.03 – 1.21)                       |
| <b>9- month landmark</b> | 5947        | 1.19 (1.10 – 1.29)                         | 1.10 (1.02 – 1.20)                       |

**Table 7.** Sensitivity analysis using 5, 6, 7, 8, 9-month landmark (without transplant patients)

|                          | Sample size | Delayed Treatment                          |                                          |
|--------------------------|-------------|--------------------------------------------|------------------------------------------|
|                          |             | Without first HCC treatment<br>HR (95% CI) | With first HCC treatment)<br>HR (95% CI) |
| <b>5- month landmark</b> | 6523        | 1.14 (1.05 – 1.24)                         | 1.07 (0.98 – 1.17)                       |
| <b>6- month landmark</b> | 6360        | 1.13 (1.04 – 1.22)                         | 1.06 (0.98 – 1.16)                       |
| <b>7- month landmark</b> | 6198        | 1.19 (1.10 – 1.28)                         | 1.11 (1.02 – 1.20)                       |
| <b>8- month landmark</b> | 6000        | 1.22 (1.13 – 1.31)                         | 1.12 (1.03 – 1.21)                       |
| <b>9- month landmark</b> | 5814        | 1.20 (1.11 – 1.30)                         | 1.11 (1.02 – 1.20)                       |

**Table 8.** Differences in comorbidities and substance use by race and socioeconomic status

|                    | CAD  |         | COPD |         | Alcohol use |         | Tobacco use |         |
|--------------------|------|---------|------|---------|-------------|---------|-------------|---------|
| Non-Hispanic White | 28.6 | p=0.61  | 17.4 | p=0.004 | 1.8         | p=0.54  | 23.0        | p<0.001 |
| Black              | 27.6 |         | 23.1 |         | 1.4         |         | 30.4        |         |
| Low poverty        | 25.1 | p<0.001 | 15.0 | p=0.006 | 1.3         | p=0.002 | 18.0        | p<0.001 |
| Moderate poverty   | 27.9 |         | 16.9 |         | 1.5         |         | 20.4        |         |
| High poverty       | 29.5 |         | 20.3 |         | 2.5         |         | 26.5        |         |

CAD – coronary artery disease; COPD – chronic obstructive pulmonary disease; SES – socioeconomic status
